# Supplementary material for: PD-L1 up-regulation restrains Th17 cell differentiation in STAT3 loss- and STAT1 gain-of-function patients
Source: PubMed Central journal article supplement — J Exp Med. 2017 Sep 4;214(9):2523–33. doi: 10.1084/jem.20161427 (PMC5584116; doi:10.1084/jem.20161427), 2017-09-04
Supplement: JEM_20161427_TableS1.pdf [file JEM_20161427_TableS1.pdf]

Table S1. **Genotype and phenotype information on the patients in the study**

| Age/sex | Disease Mutation Protein Domain          | CMC? | Other infectious history                                                                                                   | Other clinical features                                                                                                                        |
|---------|------------------------------------------|------|----------------------------------------------------------------------------------------------------------------------------|------------------------------------------------------------------------------------------------------------------------------------------------|
| 25/M    | STAT3 LOF<br>c.1027 G>T<br>DNA binding   | No   | Recurrent skin abscess<br>Pneumonia with pneumatocele formation<br>Recurrent otitis media<br>Cellulitis                    | Newborn rash<br>Retained primary teeth<br>Osteopenia with multiple fractures<br>Scoliosis                                                      |
| 37/M    | STAT3 LOF<br>c.1110delAG<br>DNA binding  | Yes  | Recurrent skin abscesses<br>Recurrent sinopulmonary infections with pneumatocele formation requiring right lower lobectomy | Scoliosis<br>Retained primary teeth<br>Asthma<br>Osteoporosis<br>Minimal trauma fractures                                                      |
| 31/M    | STAT3 LOF<br>c.1144 C>T<br>DNA binding   | No   | Recurrent skin abscesses<br>Recurrent pneumonia and sinusitis<br>Herpes zoster                                             | Newborn rash<br>Eosinophilic esophagitis<br>Alopecia areata<br>Raynaud<br>Hypothyroidism<br>Allergic asthma<br>Scoliosis<br>Multiple fractures |
| 11/F    | STAT3 LOF<br>c.1144 C>T<br>DNA binding   | Yes  | Recurrent pneumonia<br>Skin abscesses                                                                                      | Newborn rash                                                                                                                                   |
| 31/M    | STAT3 LOF<br>c.1144 C>T<br>DNA binding   | No   | Recurrent skin abscesses<br>Recurrent sinusitis and PNA                                                                    | Newborn rash<br>Hypothyroidism<br>Esophageal ulcers<br>Multiple fractures<br>Retained primary teeth<br>Asthma                                  |
| 19/F    | STAT3 LOF<br>c.1387delGTG<br>DNA binding | No   | Pneumonia<br>Warts<br>Recurrent sinus and ear infections<br>Skin abscesses                                                 | Newborn rash<br>Retained primary teeth<br>Asthma<br>Warts<br>Hyperextensibility                                                                |
| 46/F    | STAT3 LOF<br>c.1393 T>G<br>DNA binding   | Yes  | Recurrent sinopulmonary infections<br>Recurrent skin infections                                                            | Esophageal strictures<br>Retained primary teeth<br>Fractures                                                                                   |

| Age/sex | Disease Mutation Protein Domain            | CMC? | Other infectious history                                                                                                                                                               | Other clinical features                                                                                                           |
|---------|--------------------------------------------|------|----------------------------------------------------------------------------------------------------------------------------------------------------------------------------------------|-----------------------------------------------------------------------------------------------------------------------------------|
| 14/F    | STAT3 LOF<br>c.1394 C>T<br>DNA binding     | Yes  | Recurrent pneumonia<br>Mediastinal abscess                                                                                                                                             | Allergic asthma                                                                                                                   |
| 46/F    | STAT3 LOF<br>c.1861 T>G<br>SH2             | Yes  | Recurrent PNA with pneumatocele<br>Osteomyelitis                                                                                                                                       | Recurrent minimal trauma fractures<br>Scoliosis                                                                                   |
| 20/F    | STAT3 LOF<br>c.1909G>A<br>SH2              | Yes  | Staphylococcal skin infections<br>Recurrent otitis media<br>Recurrent sinusitis<br>Invasive <i>Candida</i> sinusitis<br>Infectious Mononucleosis                                       | Newborn rash<br>Minimal trauma fractures<br>Retained primary teeth                                                                |
| 47/F    | STAT3 LOF<br>c.1909 G>A<br>SH2             | Yes  | Chronic sinusitis<br>Fungal pneumonia<br>Recurrent bacterial pneumonia with cavitation<br>s/p right upper lobe resection                                                               | Osteopenia<br>Coronary aneurysms                                                                                                  |
| 13/F    | STAT3 LOF<br>c.1909G>A<br>SH2              | Yes  | Recurrent skin infections<br>Recurrent otitis media                                                                                                                                    | Newborn rash<br>Delayed dental eruption<br>Retained primary teeth<br>Recurrent minimal trauma fractures<br>Recurrent OM           |
| 25/M    | STAT3 LOF<br>c.1909 G>T<br>SH2             | Yes  | Recurrent pneumonia<br>Skin abscesses                                                                                                                                                  | None                                                                                                                              |
| 16/F    | STAT3 LOF<br>c.1972 A>G<br>SH2             | Yes  | Recurrent otitis media<br>Recurrent sinusitis<br>Recurrent pneumonia<br>Septic arthritis<br>Cervical lymphadenitis                                                                     | Pulmonary stenosis<br>Hip dysplasia<br>Systemic lupus erythematosus                                                               |
| 12/F    | STAT3 LOF<br>c.2117 T>C<br>Transactivation | Yes  | Recurrent pneumonia<br>Recurrent upper respiratory infections<br>Recurrent otitis media<br>Orbital abscess<br>Subdural empyema<br>Skin infections<br>Invasive <i>Candida</i> pneumonia | Newborn rash<br>Retained primary teeth<br>Osteopenia<br>Scoliosis<br>Eosinophilic GI disease<br>Allergic rhinitis<br>Food allergy |
| 13/F    | STAT1GOF<br>c.467 T>C<br>coiled-coil       | Yes  | Recurrent urinary tract infections<br>Molluscum contagiosum                                                                                                                            | Crohn's disease                                                                                                                   |

| Age/sex | Disease Mutation Protein Domain        | CMC? | Other infectious history                                                                                                                                                                          | Other clinical features                                                                                                                   |
|---------|----------------------------------------|------|---------------------------------------------------------------------------------------------------------------------------------------------------------------------------------------------------|-------------------------------------------------------------------------------------------------------------------------------------------|
| 36/F    | STAT1 GOF<br>c.467 T>C<br>coiled-coil  | Yes  |                                                                                                                                                                                                   | Congenital midgut malrotation<br>Hypothyroidism<br>Recurrent UTIS, sinopulmonary infections                                               |
| 30/M    | STAT1 GOF<br>c.493 G>C<br>coiled-coil  | Yes  | Recurrent otitis media<br>Shingles                                                                                                                                                                | Type 1 diabetes mellitus                                                                                                                  |
| 34/F    | STAT1 GOF<br>c.704 A>C<br>coiled-coil  | Yes  | Recurrent pneumonia with bronchiectasis<br>Recurrent sinusitis                                                                                                                                    | None                                                                                                                                      |
| 60/F    | STAT1 GOF<br>c.704 A>C<br>coiled-coil  | Yes  | Recurrent sinusitis<br>Recurrent urinary tract infections<br>Pneumonia vaginitis<br>Recurrent otitis media<br>Skin boils<br>Herpes simplex virus oral ulcers<br>Shingles<br>Molluscum contagiosum | basal cell and squamous cell skin cancer<br>hemangiomas<br>aneurysms                                                                      |
| 9/M     | STAT1 GOF<br>c.983 A>G<br>DNA binding  | No   | Recurrent lung infections                                                                                                                                                                         | Hypothyroidism<br>Insulin dependent diabetes mellitus<br>Growth hormone deficiency<br>Failure to thrive<br>Enteropathy                    |
| 27/F    | STAT1 GOF<br>c.1057 G>A<br>DNA binding | No   | Disseminated coccidiomycosis<br>Herpes simplex virus oral ulcers                                                                                                                                  |                                                                                                                                           |
| 4/M     | STAT1 GOF<br>c.1073 T>G<br>DNA binding | Yes  | Herpes simplex virus otitis media<br>Recurrent sinusitis<br>Skin infections                                                                                                                       | Type 1 diabetes mellitus<br>Hypothyroidism<br>Enteropathy<br>Bronchiectasis<br>Celiac disease<br>Developmental delay<br>Cerebral aneurysm |
| 13/F    | STAT1 GOF<br>c.1154 C>T<br>DNA binding | Yes  | Respiratory syncytial virus bronchiolitis<br>Mycobacterial skin infection<br>Shingles<br>Recurrent pneumonia<br>Recurrent otitis media                                                            | Insulin dependent diabetes mellitus<br>Vasculopathy/aneurysms<br>Bronchiectasis                                                           |

| Age/sex | Disease Mutation Protein Domain | CMC? | Other infectious history                                                                                                    | Other clinical features                                                                                     |
|---------|---------------------------------|------|-----------------------------------------------------------------------------------------------------------------------------|-------------------------------------------------------------------------------------------------------------|
| 26/F    | STAT1 GOF<br>c.1885C>T<br>SH2   | Yes  | Recurrent sinusitis and necrotizing pneumonia complicated by empyema and bronchopleural fistulae<br>Recurrent herpes zoster | CD4 and B cell lymphopenia<br>Hypogammaglobulinemia on IVIG<br>Retained primary dentition<br>Hypothyroidism |
